# Supplementary material
Source: Springer Nature journal article supplement (https://www.springermedizin.de/resource/supplementary/12974_2011_441_MOESM2_ESM.pdf/9601278)

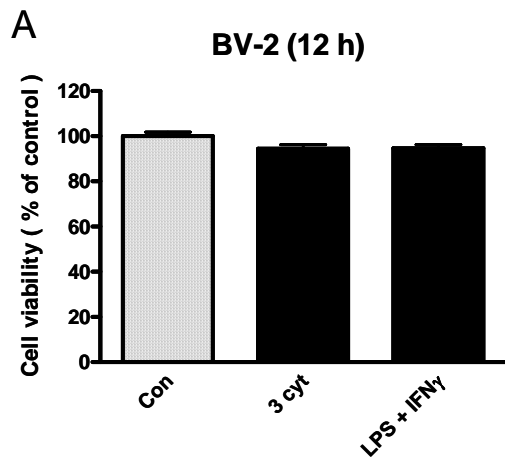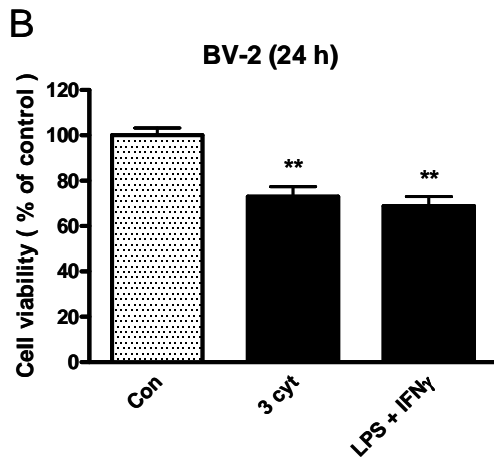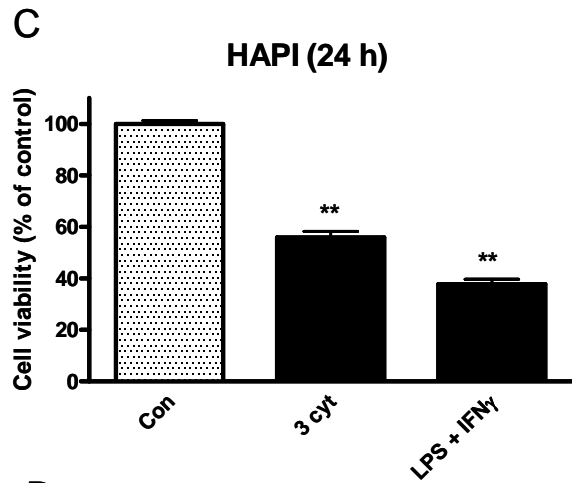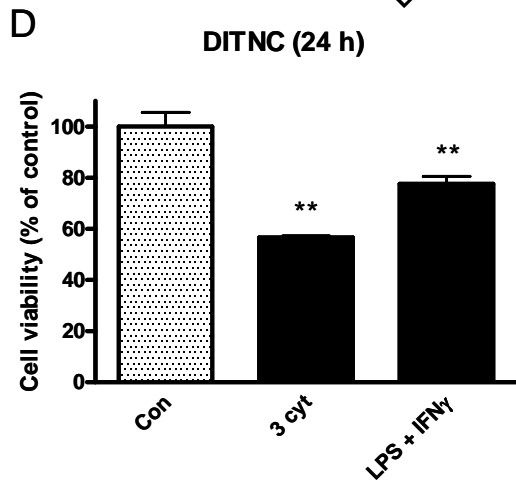

Supplement: MOESM2 [file 9601278]
